# Supplementary material for: Identification and Expression Analysis of the Nucleotidyl Transferase Protein (NTP) Family in Soybean (Glycine max) under Various Abiotic Stresses
Source: Int J Mol Sci. 2024 Jan 17;25(2):1115. doi: 10.3390/ijms25021115 (PMC10816777; doi:10.3390/ijms25021115)
Supplement: Supplementary file 1 [file ijms-25-01115-s001.zip]

Archive with 12 entries (12 files):
- Supplement Figures.pdf
- Table S1.xlsx
- Table S10.xlsx
- Table S11.xlsx
- Table S2.xlsx
- Table S3.xlsx
- Table S4.xlsx
- Table S5.xlsx
- Table S6.xlsx
- Table S7.xlsx
- Table S8.xlsx
- Table S9.xlsx
