# Supplementary material for: Identification and Expression Analysis of the Nucleotidyl Transferase Protein (NTP) Family in Soybean (Glycine max) under Various Abiotic Stresses
Source: Int J Mol Sci. 2024 Jan 17;25(2):1115. doi: 10.3390/ijms25021115 (PMC10816777; doi:10.3390/ijms25021115)
Supplement: Supplementary file 1 [file ijms-25-01115-s001.zip › Table S1.xlsx]

## Sheet: Sheet1
Table S1. The primer sequences were used in this study.
Primer name	Forward Primer(5`-3`)	Reverse Primer(5`-3`)
GmNTP1	GAGGAGGTGACAGAGGAGAAGTC	CTGCTTTTGCCAGGATTAGGT
GmNTP2	GTCACCCCTAACTCCGTCACTA	TGAACGAAACCATCGACCAC
GmNTP3	AAGCAATCATCCTGTGCCATC	GTGACTGACGAAATAACTGTTCCA
GmNTP4	GAGCCTGTCCTCTATGGAGATT	TAGAGTTTCTGGGCCGGG
GmNTP5	TCATCCGAGACTACGACCAATAC	TTTTAGCACCGTAGGAAAGAGC
GmNTP6	ATGTACTGGTGCCCGAAGC	TGGCTAATATGTCTGACTCAAGCT
GmNTP7	TCCAGTTCTCTAGCTTTGCCTG	CCACGTGATTTCCCTCCTCC
GmNTP8	TCTGTTGATTCGCCTCCCA	GCAAGACACCCAAATGAAAATG
GmNTP9	CACTTCCCCATCACCCCTAA	ATGAACGAAACCATCGACCTT
GmNTP10	GCAGAGGGGTGTTGCTTACT	TCACTCCTTTACGCGCTTGT
GmNTP11	ACCTATTTCCCTCAACCTTCTACA	ACAGACTTCTCCATCACCTCCC
GmNTP12	CACGTAACAACCACCAACCTTC	CAGTGTTGAAATGCGTAGAGGA
GmNTP13	CTTCGCAGCTGCTTGAGTTC	ACAGGGCAGTCTTGTGAGTG
GmNTP14	TGGTTGATGATCTTATAGGCGT	TGTTAATTGACCTTGCCCTGTT
GmNTP15	TGATGTACCGGTTTCTCCGT	AGTTTTGGTGCGTTGATGACG
GmNTP16	GATGAGGAACTATGGCGGATGA	CCAAATGGGAAAACCTGTGC
GmEF1	TGCCGCCAAGAAGAAGTGAT	ACATGAAATCGGCGGACACT
NLS	GGAATTCATGCCTAAGAAGAAGAGAAAGGTTGGATCCG	CGGATCCAACCTTTCTCTTCTTCTTAGGCATGAATTCC
GmNTP2-GFP	CGACGGTATCGATAAGCTTATGAACGGTGGTGGAGGTGA	ATCCCCCGGGCTGCAGGAATTCACTGGGAACATAGGGCTCAA
GmNTP14-GFP	CGACGGTATCGATAAGCTTATGAGTACACATAGTACGTT	ATCCCCCGGGCTGCAGGAATTCACTCTTTGGCCTCCATATCT
