# Supplementary material for: Identification and Expression Analysis of the Nucleotidyl Transferase Protein (NTP) Family in Soybean (Glycine max) under Various Abiotic Stresses
Source: Int J Mol Sci. 2024 Jan 17;25(2):1115. doi: 10.3390/ijms25021115 (PMC10816777; doi:10.3390/ijms25021115)
Supplement: Supplementary file 1 [file ijms-25-01115-s001.zip › Table S2.xlsx]

## Sheet: Sheet1
Table S2. NTP family members of soybean, Arabidopsis and rice, including gene name, gene ID and protein sequence.
Gene name	Gene ID	Protein sequence
GmNTP1	Glyma.02G235800	MGDLHVNGVVFGEDRPCASSPPSPPLPPWNPDPSSVAADAWAAAERNTAEILRRIRPTLAADRRRREVVDYVQRLIRYGARCEVFPYGSVPLKTYLPDGDIDLTALSCENIEDGLVSDVRAVLHGEEINEAAEYEVKDVRFIDAEVKLVKCIVQDIVVDISFNQLGGLSTLCFLEKVDRLVAKDHLFKRSIILIKAWCYYESRVLGAHHGLISTYALETLVLYIFHQFHVSLDGPLAVLYRFLDYFSKFDWDNYCVSLKGPVSKTSLPNIVAEVPENGGNTLLTEEFIRSCVESFSVPSRGADLNLRAFPQKHLNIIDPLKENNNLGRSVNKGNFYRIRSAFKYGARKLGWILRLPEDRIAEELIRFFANTLERHGSTQGNVDKSFLSLSTASGKDRKP…
GmNTP2	Glyma.03G020100	MNGGGGDLPPSNGGEFLLSLIQQRPHHPHPPPQSPAIDPAVTAIGPMIPVALPPWQIAGGDQPHHHQHTHPHHLPPPPPWSHTLSSSSPLYPPNFFGLPHNPFPPPRNHFPVTVTPNSVTNGVNANVNLAHDLRKLGFPIEESHHNNNNNNNVVDGFVHHHHQQQQQQQHELKLQFGSLPTVAYAAAEVSSNGDSLLNLKFNRGGNVVHPTSNSSGNVVLQGNHDAVERERRGLGGYMAGGSLPPETSRVAPGFGNRIRGKGLEGRNENLYGRREGGRMVSGERSNVGLVDQLDRPGPPARSHLHSGSGNETSGIGEVGGRDSKHKGGGRLRMEGFPESGGRVADVDVLGEQLADSLLVEDESDDRTNLRQRRREKDVRFLDSRGQQIMSQRGRMYRRQ…
GmNTP3	Glyma.03G032900	MAHHQLIDTLTSHISLYHSQSPNPNPNPNPNPRSSILKWFSSLSIHHRQAHLTIVDANFVQILLQMLAKLRSHGHGSFILLPDLPSRDNLPTLCFKKSRGLLARVADSDAAGRAVFESSRLFDSREGEEAAIATLPSARRLDALALAEGFVGDVDRFVEAMDRISGGGFLRGEEAELGEDWVELHWLKSKGYYGIEAFIANRIEVSMRLAWLNCCGGRKRGVKLKEKMGAAGVGVNVFWRKKGCVDWWGNLDAGTRRKVISTFLMKAAKPLTHDVLEVASSSSEDEIWLYSMGVDKLLQSNHPVPSKRSISALPADMEFGTVISSVTFCKKPAALARAFNSLLVLHDVNMMVTSSLNSEYDIENLFFSSLGSVCTISDCILRKMRGFLMVISLDCTKLE…
GmNTP4	Glyma.04G189100	MDGKRENLLPSSLPSQLLSIDEELWQMAEDRVQEILWTIQPNVLSEVNRKDVIDYVQRLIRDYYGAEVLPFGSVPLKTYLPDGDVDLTTLIHEDAEDDLAQAICNVLKSGDDSEYQVKDIQYIRAQVRLVKCTVKNIAVDISFNQMAGIYTLRFLEQVDQLVGKNHIFKRSIILIKGWCYYDSRLLGGHHGLLSTYAVEILVLYIINRFHSSVRGPLEVLYIFLDYYGSFDWDHNYISIWGPKSLSSLPEIAEAPECDQGEFLLQKEFLGNYKNMCSYPAGASETLTHEFPVKFMNILDPLRNDNNLGRSVSIASLHRLRFAFSYGVQKLKQIFTLPGENMGAALEKFFSSTLNRNGKGERADVSVPVAPFGTGRFEEPVLYGDCENYCGGLQYVQLYH…
GmNTP5	Glyma.06G144300	MDSKRENLLLSSLPRQLLSIDEELWRMTEERIQEILWTIQPNVLSEMNRKNVLNYVQKLIGDYYDTKVFPFGSFPLKTYLPDGDIDLTVINHEDEEENLAKEICTILECANDLIYQVKDIEHIRAQVQVVKCTVKNIPIDITFNQMTGLCTLCFLEQVDQLAGKNHIFKRSIILIKAWCCYDSRLLGSQHGLLSTYATEVLVLYIINRFHASVRDPLEVLYIFFDYYGTFDWEHNYMSIWGPKALSSLPEIVDRPECDQDEFLLHKEFLINYRDIFSSKAKSSETTTNTFPVKHINILDPLRNDNNLGRSVNEASFHRIRFALSYGAKKFKQIFTLAGENMGEALEKFFFDTLQRNGKGERADVDVPVSPFGTGRYEKSVLDGDCDSYYGGSQYAQQYP…
GmNTP6	Glyma.06G158600	MYWCPKQNSPKGRSERENHFFHFKPLCPLSAHRFLSWFREVKMESEDSFSDLIKMAKKLESDILAKINFSSAHVIDLDRLLCDTFIRQCPTPLDYDNRRDLVHIFNTMTKEIYGNGDGSPVVEEYGSFVMDMFDGKSDIDLSLNFNNSIEVSRQKKISALYRFNKKLQSIQSKGHVTGLQLIFSARVPIIKVTDSGTGIECDLSVDNRDGINKSHIIRAISDIDERFRKLCFLMKSWAKVHDINSPKDSTLSSFSIVSFVAFHLQTRNPPILPPFSILLKEGDNPAYVAKVVETYFNYGKQNKESLAMLFITLLVKLASVENLWQKGFCASLYEGSWILKSWKCSYSMSVEDFIDRSQNVARAVRKKVKFNLWMYP*
GmNTP7	Glyma.06G176600	MDDKQENLLTLSLPSQLVSIDEELWRMAEDRVQEILWTIEPNVLSEVNRKDVIDYVQRLIKGYYGAKVLPFGSVPLKTYLPDGDVDLTTLIHEDAEEDLAQAICNILKSGDDSEYQVKDIQYIRAQVRLVKCTVKNIAVDISFNQMAGIYTLRFLEQVDQLVGKNHIFKRSIILIKAWCYYDSRLLGGHYGLLSTYAVEILVLYIINRFHSVVRGPLEVLYIFLDYYSSFDWDHNYVSIWGPKSLSSLPEIVETPECDQGEFLLQKEFLTNYKNMCSYPTRASETLTHEFPVKFMNILDPLRNDNNLGRSVSIASLHRLRFAFAYSAQKLKQIFTLPGENMGAALEKFFFSTLERNGKGERADVGVPVAPFGTGRFEEPVLNGDCENYCGGSQYVQLYH…
GmNTP8	Glyma.07G056700	MGEHEGWAQPPSGLLPNGLLPNEAASVIQVLDSERWLKAEQRTAELIACIQPNPPSEERRNAVADYVQRLIMKCFPCQVFTFGSVPLKTYLPDGDIDLTAFSKNQNLKDSWAHQVRDMLENEEKNENAEFHVKEVQYIQAEVKIIKCLVENIVVDISFNQLGGLCTLCFLEEVDNLINQNHLFKRSIILIKAWCYYESRILGAHHGLISTYALETLVLYIFHVFNNSFAGPLEVLYRFLEFFSKFDWENFCVSLWGPVPISSLPDVTAEPPRKDGGDLLLSKLFLDACSSVYAVFPGGQENQGQPFVSKHFNVIDPLRVNNNLGRSVSKGNFFRIRSAFAFGAKKLARLLDCPEEELFSEVNQFFFNTWERHGSGERPDVPSIDLRHLSLSSHDQLQRS…
GmNTP9	Glyma.07G082200	MNGGGGDLPPSNGGEFLLSLIQQRPHQPHPHPPPQSPAIDPAVAAIGPTIPVAPPLWQILSADHPHHHHHQPHPHHLPPPWSHSLSSSPLYPPNFFGLPHNAFPPPRTHFPITPNSVANGVNANINLAHDLRNLGFPIEESHNNNNNNNKVDGFVHHHHQQQQQQHELKLQFGSLPTVAYSAAEVSSNGGDSLLNLKFNRVDHPTSNSSGNVVVQGNHDAVERERRGLGGYRAGGSLPPETSRVPPGFGNRTRGKGLEGRNENLYDRREGGRMVSGERSNVRGNVGHKMGLVDQLDRPGPPAGSHLHSGSGNDAGIGEVGGRDGKHKEIGRLRMEGVPESGGGGADVDVLGEQLADSLLVKDESDDRTNLRQRRREKDVRLSDSRGQQIMSQRGRMYRR…
GmNTP10	Glyma.11G222700	MSTHSMLDIVVNDILRVVTPLQEDWEIRFAIINDFRSIVESVESLRGATVEPYGSFVSNLFTRWGDLDISIELSNGLHISSAGKKQKQTLLGEVLKALRMKGGGSNLQFISNARVPILKFKSYRQGVSCDISINNLPGQMKSKILLWINKIDGRFRHMVLLVKEWAKAHKINNSKAGTFNSYSLSLLVIFYFQTCIPAIFPPLKDIYPGNMIDDLIGIRSDAENLIAETCDANINRFISNRARSINRKSVAELFVDFVGKFAKMDSMAVEMGICPYTGKWEQIEDNMIWLPKTYAIFVEDPFEQPQNTARSVSAGQLKKITETFARTHDLLTSTNQNQISLLSNLAPAHVIRCITRPYGGGYIHPTQPQVQRGVAYFHPTQPQVFRPTQPQVQRAIRPL…
GmNTP11	Glyma.14G203800	MGDLLVNGVVFGEDRPCASSPPSPPLPPSNPDPSSVAADAWAAAEKTTAEILSRIRPTLAADRRRREVVDYVQRLIRYGARCEVFPYGSVPLKTYLPDGDIDLTALSCQNIEDGLVSDVRAVLHGEEINEASEYEVKDVRFIDAEVKLVKCIVQDIVVDISFNQLGGLSTLCFLEKVDRLVAKDHLFKRSIILIKAWCYYESRVLGAHHGLISTYALETLVLYIFHQFHVSLDGPLAVLYRFLDYFSKFDWDNYCVSLKGPVGKSSPPNIVAEVPENGGNTLLTEEFIRSCVESFSLPSRGADLNLRAFPQKHLNIIDPLKENNNLGRSVNKGNFYRIRSAFKYGARKLGWILMLPEDRITEELIRFFTNTLERHGSTPGNVNKSFLSLSTASRKDRKP…
GmNTP12	Glyma.16G025800	MGEHEGWAQAPSGLLPNGLLPNEAASVIQVLDSERWLKAEQRTAELIACIQPNPPSEERRNAVADYVQRLIMKCFPCQVFTFGSVPLKTYLPDGDIDLTAFSKNQNLKDSWAHQVRDMLENEEKNENAEFHVKEVQYIQAEVKIIKCLVENIVVDISFNQLGGLCTLCFLEEVDNLINQNHLFKRSIILIKAWCYYESRILGAHHGLISTYALETLVLYIFHVFNNSFAGPLEVLYRFLEFFSKFDWENFCVSLWGPVPISSLPDVTAEPPRKDGGDLLLSKLFLDACSSVYAVFPGGQENQGQPFVSKHFNVIDPLRVNNNLGRSVSKGNFFRIRSAFAFGAKRLARLLDCSEDELFSEVNQFFFNTWERHGSGERPDVPSIDLRHLSLSSHDQLQRF…
GmNTP13	Glyma.16G055700	MDRQENLLAFSMPSQLLSIDEELWRMAEERAQEILWTIEPIVLSEVNRKDVIDYVQRLIRGYYGAEVLPFGSVPLKTYLPDGDIDLTALSHEDAEEDLAQAVCNILQSGDDPEYQVKDIQYIRAQVRLVKCTVKNIAVDISFNQMAGICTLRFLEQVDQLVGKNHIFKHSIILIKAWCYYESRLLGGHHGLLSTYAVEILVLYIINRFHSSVRGPLEVLYIFLDYYGSFDWDHNYVSIWGPKPLSSLPEIAETPECDQGEFLLQKEFLRNYRNMCSFPSRASETMTHEFPVKFMNILDPLRNDNNLGRSVNIANLHRVRFALSYGARRLKQILTLPGENMGAALEKFFFSTLDRNGKGERADVAVPVSPFGIGRSEESVLRGDCESYCGGLQYVQLYRN…
GmNTP14	Glyma.18G034900	MSTHSTLDIVVNDILRVVTPVQEDWEIRFAIINDLRSIVESVESLRGATVEPFGSFVSNLFTRWGDLDISIELSNGLHISSAGKKQKQTFLGDVLKALRMKGGGSNLQFISNARVPILKFKSYRQGVSCDISINNLPGQMKSKILLWINKIDGRFRHMVLLVKEWAKAHKINNSKAGTFNSYSLSLLVIFYFQTCIPAIFPPLKDIYPGNMVDDLIGVRSDAENLIAQTCDANINRFISNRARSINRKSVAELFVEFIGKFAKMDSMAVKMGICPYSGKWEQIEDNMIWLPKTYAIFVEDPFEQPQNTARSVSAGQLKKITEAFARTHDLLTSTNQNQISLLSNMAPAHVIRCITRPYGGGYFHPTQPQVQRAIRPQLQSQRHFQNVSQGTSSNSSSSK…
GmNTP15	Glyma.19G092300	MCFFFFFVCAMDRQENLLPSSMPSQLLSIDKELWQMAEERAQEILWTIQPNVLSEVNRKDVIDYVQRLIRGYYGAEVLPFGSVPLKTYLPDGDIDLTALSHEDAEEDLAQAVCYVLQSGDDPEYQVKDIKYIRAQVRLVKCTVKNIAVDISFNQMAGICTLRFLEQVDQLVGKNHIFKRSIILIKAWCYYESRLLGGHHGLLSTYAVEILVLYIINRFHSSVRGPLEVLYIFLDYYGSFDWDHNYVSIWGPKPLSSFPEIAAPLLVTETLECDHGEFLLQKEFLRNYRNMCSFPSRATKTMTHEFPVKFMNILDPLRNDNNLGRSVNIASLHRFRFALSYGARRLKQILTLPGETMGAALEKFFFSTLDRNGKGERADVDVPVSPFGIGRSIESVLCGD…
GmNTP16	Glyma.19G092500	MDDKQENLLPSSLPSQLLSIDEELWRMIEERAQEILWTIQPNVLSEVNRKNIIDYVQRLIGEYCGAQVFPFGSFPLKTYLPDGDIDLTALSHEDEEEDLVRAVCNILKSEDDSEYQVKDIEHIRAQVQVVKCTVKNIPVDISFNQMAGLYTLFFLEQVDQLVGKNHIFKRSVILIKSWCYYESRILGAHCGLLSTYATEILVLYIINRFHSSVRGPLAVLYVFLDYYSSFDWEHNYISIWGPKVLSSLPEIVDTPEYDQGEFLLQKEFLKNYRDMCSSKAKASETMTNAFPVKHMNILDPLRNNNNLGRSVNIGNLSRIRLAFSLGSQRLKQILTLAGENMGAALEKFFFNTLENNGKGERADVGVPVSPFGTGRFEESVLSGDYDSYYGWSQYVQQYP…
AtHESO1	At2g39740	MSRNPFLDPTLQEILQVIKPTRADRDTRITVIDQLRDVLQSVECLRGATVQPFGSFVSNLFTRWGDLDISVDLFSGSSILFTGKKQKQTLLGHLLRALRASGLWYKLQFVIHARVPILKVVSGHQRISCDISIDNLDGLLKSRFLFWISEIDGRFRDLVLLVKEWAKAHNINDSKTGTFNSYSLSLLVIFHFQTCVPAILPPLRVIYPKSAVDDLTGVRKTAEESIAQVTAANIARFKSERAKSVNRSSLSELLVSFFAKFSDINVKAQEFGVCPFTGRWETISSNTTWLPKTYSLFVEDPFEQPVNAARSVSRRNLDRIAQVFQITSRRLVSECNRNSIIGILTGQHIQESLYRTISLPSQHHANGMHNVRNLHGQARPQNQQMQQNWSQSYNTPNPP…
AtNTP2	At2g40520	MADHKGKVPVSLSASSSSLSLSPKTTPIEAEVWLIAEARAQEILCAIQPNYLAERSRNKIISNLQTLLWERLGIEVYLFGSMPLKTYLPDGDIDLTVLTHHASEEDCARAVCCVLEAEMGNSDLQVTGVQYVQAKVKVIKCSIRDVAFDISFNQLAGLGALCFLEQVDKAFGRDHLFKKSIILVKAWCFYESRILGANSGLISTYALAILVLNIVNMSYSSLSGPLAVLYKFINYYGSFDWKNYCVTVTGPVPISSLPDITETGNHEVFLDEKFFRECMELYSGETGVVEASRKYFPVKYYNILDPLKHSNNLGRSVTKGNMVRLRNCFMLGVQKLRDVLTLPGENVGWKLEKFFNVSLERNGKGQRQDVEEPVVAFGTGAADYSQLKGDFDRYRNNLI…
AtURT1	At2g45620	MADGGAEPPAPPSSINAGEFLLSILHGSPSPSSQGPQHHQSFALDPAIAAIGPTVNNPFPPSNWQSNGHRPSNHNPPSWPLAFSPPHNLSPNFLGFPQFPPSPFTTNQFDGNQRVSPEDAYRLGFPGTTNPAIQSMVQQQQQQQLPPPQSETRKLVFGSFSGDATQSLNGLHNGNLKYDSNQHEQLMRHPQSTLSNSNMDPNLSHHRNHDLHEQRGGHSGRGNWGHIGNNGRGLKSTPPPPPPGFSSNQRGWDMSLGSKDDDRGMGRNHDQAMGEHSKVWNQSVDFSAEANRLRGLSIQNESKFNLSQQIDHPGPPKGASLHSVSAADAADSFSMLNKEARRGGERREELGQLSKAKREGNANSDEIEDFGEDIVKSLLLEDETGEKDANDGKKDSKTS…
AtNTP4	At3g45750	MGSRGNVAEDKNVSSKVIRKKVNNTVSIALKRYKIDSYILLDLDKVLNDVYCSFRPVSADYNTRKELVKNLNTMALDIYGKSEESSPVLEAYGSFVMDMYSSQSDLDVSINFGNGTSEIPREKKLEILKRFAKKLRSLQGEGQVKNVESIFSAKVPIVKFSDQGTGVECDLSVENKDGILNSQIVRIISQIDGRFQKLCLLVKHWAKAHEVNSALHRTLNSVSITLLVALHLQTQNPPILPPFSMLLKDGMDPPNVEKRAQKFLNWGQRNQESLGRLFATFFIKLQSVEFLWRQGLCVSVLNGLWISKKWKKVGVGSISVEDFTNISQNVARRVNGAGAKKIYSSINRTVEDIFEFLNDKVAGTDLRHRLFGKGSVVQIPPVAPLNGKTAGIHKVSGQQ…
AtNTP5	At3g45760	MDFRKNQAGEKNVSSKGIQKKVKNTMSIASKRYNIDSYILLDLDKVLDDAYSSFRPVSADYNTRKELVKNLNAMAIDIFGKSEESSPVLEAYGSFAMNTFSSQKDLDVSINFSSGTSEFYREKKLEILTRFATKLRSLEGQGFVRNVVPILSARVPIVRFCDQGTGIECDLTVESKDGILTSQIIRIISQIDDRFQKLCLLIKHWARAHGVNNASHNTLNSISITMLVAHHLQTQSPPILPPFSTLFKDGIDPPIVEKRTQKFLNWGQRNQESLGRLFATFFIKVEDFTDVARNFARVFSDYGAEKIYSSINRTVDDILEFLNGKVAGEHLTQKLFSQQTVVEPIPPVSPQQPHKKRVCLEKGYRAVGGISHGREETHETSRGKRKRSGGNWGCRFSGG…
AtNTP6	At3g51620	MAADLDDLEEESSSSLSPPLLPPPRSPLNQPELWMRVEEATREIIEQVHPTLVSEDRRRDVILYVQKLIRMTLGCEVHSFGSVPLKTYLPDGDIDLTAFGGLYHEEELAAKVFAVLEREEHNLSSQFVVKDVQLIRAEVKLVKCLVQNIVVDISFNQIGGICTLCFLEKIDHLIGKDHLFKRSIILIKAWCYYESRILGAFHGLISTYALETLVLYIFHLFHSSLNGPLAVLYKFLDYFSKFDWDSYCISLNGPVCLSSLPDIVVETPENGGEDLLLTSEFLKECLEMYSVPSRGFETNPRGFQSKHLNIVDPLKETNNLGRSVSKGNFYRIRSAFTYGARKLGQLFLQSDEAISSELRKFFSNMLLRHGSGQRPDVHDAIPFLRYNRYNAILPASNHF…
AtNTP7	At3g56320	MGEIQERLSVSSSSSSSSSSLSLSTALPKGDSLPIDADSWMIAEERAHEILCTIQPALVSDRSRNEIIDYVRTLIMSHEGIEVFSFGSVPLKTYLPDGDIDLTVLTKQNMDDDFYGQLCSRLQNEERESEFHATDVQFIPAQVKVIKCNIRNIAVDISFNQTAGLCALCFLEQVDQLFGRDHLFKRSIILVKAWCYYESRILGANTGLISTYALAVLVLYIINLFHSSLSGPLAVLYKFLDYYGSFDWNNYCISVNGPVPISSLPELTAASPENGHELLLDEKFLRNCVELYSAPTKAVDSNGLEFPIKHLNIVDPLKYSNNLGKSVTQGNVQRIRHAFTLGARKLRDVLSLPGDTMGWRLEKFFRNSLERNGKGQRQDVNDPVTAFGTGRSELSELSG…
AtNTP8	At3g61690	MGEHESWAASPPSPSGLHPNGLLPGKAASVTRPLDAERWAKAEDRTAKLIACIQPNPPSEDRRNAVASYVRRLIMECFPQVQIFMFGSVPLKTYLPDGDIDLTAFSANQNLKDSWANLVRDMLEKEEKNENAEFHVKEVQYIQAEVKIIKCLVENIVVDISFNQIGGLCTLCFLEEVDHYINQNHLFKRSIILIKAWCYYESRILGAHHGLISTYALETLVLYIFYLFNNSFSGPLEVLYRFLEFFSKFDWQNFCLSLWGPVPVSSLPDVTAEPPRRDVGELRVSEAFYRACSRVYAVNIAPQEIQGQPFVSKHFNVIDPLRENNNLGRSVSKGNFFRIRSAFTLGAKKLTRLLECPKENLIHEVNQFFMNTWERHGSGRRPDAPGNDLWLSRLGDPEP…
AtNTP9	At4g00060	MENRHLPSKFFSSASSMAQNQLIDSLTSHISLYHSHSSSSSMANTIPNPRSAILRWFSSLSVHQRLSHLTVVDPKFVQILLQMLGYIRTKGPCSFIILPDLPSSSDLPSLCFKKSRGLISRVSESNESERFVFDSTRLFGSGEGERAQDCSCSVNSLDSVVMAEEFLTNVDRFVETMDVLSDGAFLRGEESDLGSNWVELEWLKAKGYYSMEAFVANRLEVSMRLAWLNTNSGKRRGIKLKEKLNAAAAAANSYWRKKACVDWWQNLDAATHKKIWTCLFGKSAKSVIYEILREANQAQQGEMWLFNFASARKGRTDTSAVSFCDMILEPNSVPRKPITVASNLSGLYVLQEFASLLILCQNGLVPVHSVFFSSMGTITTLVDCILRKLRGFLMVISID…
AtNTP10	At5g53770	MEDSDAKTEAPAFVYDTLPPLSFSDSNQSPPPTHEESHQYSVFRKEISDFPDDTTPVESATVDFFSLDVEGETTENGVEPVTPVVVASKKKSKKRKKDEEPRLESNWFSENSFSKIPMLQLHKEIVDFCDFLLPTQAEKAERDAAVESVSSVIKYIWPSCKVEVFGSYKTGLYLPTSDIDVVILESGLTNPQLGLRALSRALSQRGIAKNLLVIAKARVPIIKFVEKKSNIAFDLSFDMENGPKAAEFIQDAVSKLPPLRPLCLILKVFLQQRELNEVYSGGIGSYALLAMLIAFLKYLKDGRSAPEHNLGVLLVKFFDFYGRKLNTADVGISCKMGGSFFSKYNKGFLNRARPSLISIEDPQTPENDIGKSSFNYFQIRSAFAMALSTLTNTKAILSL…
OsNTP1	Os01g44350	MADQATALVLSFGSYHLGVHSRGSDIDVLVVGPSYVDRDFFGALAAALAETAAVAELQPPARARRARASDQDEVPRRAGGPRVRWRVGRRPRWTRAARASGTYGRRDAAGKGERHGQDSAGGAPAMDLRSPLPPRRRPPVLLSRRSPPHPSHAMPREKSERERDEEGREEGKRELTWMSDMWGPRGSHADSAATSDKIGSKPPKDLK
OsNTP2	Os01g48210	MARKARPAEPPTPGRKGRKPLPSHAPPTEAAAAAATAAASPAAATASPAADAMEAEAGGVAIVYDALPGLTLAFSPEEEEHLEGATADLGGASTSASAAVVEEVEDATAAYSVFRNEITAAGDALVDIPAADFFSLDVSAAVEDEPATPRALSPQPAPEATLSGSLAPAEQPAQGSERAWFRGGRRFRSPMLQLHKEILDFCDFISPSAEEQSSRTAAVKAVSNVIKHIWPQCKVEVFGSFRTGLFLPTSDIDVVIFDSRVKTPQVGLYALAKALSQKGVAKKIQVIAKARVPIVKFVERKSEIAFDISFDMDGGPQAADFIKDYVKKFPALRHLCMILKVFLHQRELNEVYTGGIGSYALLTMLITHLQLIWGGKDILGYRKKEHNLGILLIALFDFY…
OsNTP3	Os01g62790	MSIWRVPNYDVLEKCTEDILSLIKPVEGDRNKRIYAIQELADTIYSAGALRGDLDVSVELFNALNLPISKRKKQDTLREVRRALQKRGIARHMEFIPNARVPVLQYVSNQYGISCDISISNYPGRIKSKIFYWINTLDDRFGDMVLLVKEWAKAQNINDPKNGTLNSYSLCLLVLFHFQTCEPAILPPLKEIYEGNIMEDISDKISLWEYGLPVMDSDYLFVSALLFNCCIHIQGGRTIMRNILMRFAP
OsNTP4	Os02g02970	MVGGEPLRRRRHLADDGFFRFLLPSPKPATTTTTTPPPAALFVPPHRLIAPPVPLPQPPRPEERLFIVPPTRPSWLPPLSIPPPATATAPPPTRCPPRRMGNGGGGCFGGRSGVVGWRYGGFVGNGGRRGFERRRVGGGFIGAANAGEATGGERRAVVRKREKKVWVAVEKKGEDCGGGDEDQAAMGAGYAGGDERDEQVDVDDDEQDDGDGDDPFDVAADHDLLAVVADGAGSEKPMEQLGSPPDQPPPPPPRQRVGTRRWRVERRHDIDAFTPGLLSLYESLNPSEEHKAKQRQLIESLTNSVSKEWPNAQLHLYGSCANSFGNSHSDVDVCLQIDTAAEENIAELLLALAETLRKDDFDNVEAITSARVPIVKIADPGSGLSCDICVNNLFAVANT…
OsNTP5	Os03g11240	MVPNGLLPNASAGVTRRLDGERWAAAEVRTAELIARIQPNADSERRRRAVYDYVRRLITNCLSCQVFTFGSVPLKTYLPDGDIDVTAFSDSEELKDTWANLVRDALEHEEKSENAEFRVKEVQYIQAEVKIIKCLVDNIVVDISFNQVGGLCTLCFLEEVDALISQNHLFKRSIILIKAWCFYESRILGAHHGLISTYALETLVLYIFHVFNNCFTGPLEVLYRFLEFFSNFDWEKFCLSLSGPVPISSLPDMTAEPPRMDAAELLLSKSFLDKCSYAYAVTPRIQESQGQQPFVSKHFNVIDPLRTNNNLGRSVSKGNFFRIRSAFSFGAKRLAKLLECPKEDLIAEVNQFFTNTWIRHGSGNRPDAPTLGLVHQHHLKVVPAEASNSQRSAMALKKN…
OsNTP6	Os03g21850	MMAGGGGGGGGGTLAAAMARAAPGAAAIPAGAVARAEEAAGEVVRRVRPTEASERRRAAVVGYARRLVGTALGCEVFAYGSVPLKTYLPDGDVDLTVLGNTSYGSTLIDDIYHILQSEEQNCDAEFEVKDLQLINAEVRLIKCTIENIVVDISFNQTGGICALCFLELVDRKVGKNHLVKNSIILIKAWCYYESRLLGAHHGLISTYALETLILYIFNLFHKSLHGPLEVLYRFLEYFSKFDWDNYCISLNGPVALSSLPNQIVEATNTPGSDLLFDKEFLNNSVQKTDSNACNTEFRSKYLNIIDPLKEHNNLGRSVNKASFNRIRTAFSYGAQKLGQVLLLQPELIPDEIYGFFKNTLNRIGSGVRPDIGDESYNDAFRCESFLGPGKALWDEMSSM…
OsNTP7	Os06g45800	MASASASASPRTARQLADALTAHLSLYHAATPPPPSSSSPRAAILRWLASLSPPCRAAAATSLLTPAAAAALLSMLRRLRARGHSSFFVLHPPSPSSAAVAEEGAAAPTVLSRLSRGLLARAAEASRGQGLVFDHLLLFPSSPTSSSRLDAITVAEELLGDLDGFVAAMDEISGGRFLCGDGEVDLVAMVGEEFPELPWLKAKGYYVIEEFVANWVEIALRMSWAAAGGGGGGGGGGRKAVRVGKGVKEKAGLAANAFWREKGYVDWWMRLEPRVRARIMGAFFGKGTTALEIVYLKSNISNRSGDAIFFTKLMSAGTVADHILMKLRGILMVVSTESINLELIGDEAPKAAKKKDVEKISGGSRKGKKKSSSLKKLITSSKQMKDIGCSSSDSHDPKV…
OsNTP8	Os07g48170	MAAYRGRRDYGGGWWSASAGSGRMTLAAVMATRAPRPAFIRREAIRAAEAAADEVVLRVQPTEEAERTRQGIIGYLKLLFGTALGCEVFAFGSVPLKTYLPDGDIDITILGNTAPDSTFISEVRGILELEEQEDGADVAITGLQFIDAEVKLIKCVIDNIVVDISFNQIGGVTTLCLLELVDHEVGNDHLFKRSIMLIKAWCYHESHILGAHRGLISTYALEVLVLYIFNIFHKSLHSPLEVLYKFLEYFSKFDWDKYCISLNGPVPLSSLPNLTGESYSVEPSGIHDELLFGPNGSCDRLIVLKKDSDGSNMNFRPKYLNIIDPIKSSNNLGRSVSKGSFYRIRGAFSFGAQNLSQILMLPTDLIPTEIFGFFVNTLKSHGRGKRSDVGNNGSFEPSL…
OsNTP9	Os08g44560	MAAAASPPVPSKVDASSRPDRSPRPQSLEISWDSQALCKRAESCELEAEVPSINPTLLPVLEDLLIELYAILRPKPDDYEQRHLMIDVFNKIAEEIYGKKKGFPVVEAFGSFTMDLFTSKSDLDLSVNFNADFHSQFARKDKISVIRNLAKVLYAHQRNGRCHGVLPVVTAKVPVLKVIDKGTGVECDISVENKDGMSRSMIFKLISSIDERFQILCYLMKFWAKAHDVNCPRDRTMSSMAIISLVAFHLQTRRPPILPAFSALLKDGPDFPSIQRNVSLVEGFGSRNKESVAELFVSLMSKLLSVEGLWEQGLCASNFEGSWIFKTWERGVGNLSVEDFLDRSQNFARAVGKEEMQKISECIRVAVLNLNNFFRGKIDAPKLKNLLFEPPHQDELISN…
OsNTP10	Os10g11034	MSIFESLVPSDEEISKQKQLLATLSRLINKEWPNSKLYLYGSCANSFGFSNSDIDLCLSIDEKEMSKVDIILKLAHILHAGNLRNIQALTRARVPIVKLMDPNTGLSCDICVNNLLAVVNTKLLRDYSRIDKRLRPLAFIVKHWAKSRCVNETYQGTLSSYAYVIMCIHYLQSQRILPCLQEMEPTYYVTVDNNICAYFDQVDKLNGFGAQCKDTLSRLLWGFFRYWAYAHNYTKDVISIRTGRTISKNMKDWTRRIGNDRHLICIEDPFETSHDLGRVVDNRSIWALREEFERAAEILHLDPNPSITLFEPYVPSEAET
OsNTP11	Os11g02320	MVDNQGCSPALEPVPTPPNPDPSSISPEAWDPLEAAAGAVVARIQPNPPSEDRRAAVIAYVQHLLRCTVGCQVFPFGSVPLKTYLPDGDIDLTAFGHSSDEILAKQVQAVLESEEARKDAEFEVKDVQYIHAEVKLVKCIVQNIIVDISFNQFGGLCTLCFLEKVDQKFEKYHLFKRSIMLIKAWCYYESRILGAHHGLISTYALEILVLYIFHLFHGTLDGPLAVLYRFLDYYSKFDWDNKGISLYGPISLSSLPELVTDSPDTVNDDFTMREDFLKECAQWFTVLPRNSEKNTQVFPRKFFNIVDPLKQSNNLGRSVSKGNFLRIRSAFDFGARKLGKIIQVPDNFTMDEVNQFFRNTLKRHCSRVRPDVQEIALDFNGERADNDSSPLYSNNSFGD…
OsNTP12	Os12g02260	MVDNQGCSPALEPVPTPSNPDPSSISQEAWDPLEAAAGAVVARIQPNPPSEDRRAAVIAYVQGLLRFNVGCQVFPFGSVPLKTYLPDGDIDLTAFGHSSDEILAKQVQAVLESEEARKDAEFEVKDVQYIHAEVKLVKCIVQNIIVDISFNQFGGLCTLCFLEKVDQKFEKNHLFKRSIMLIKAWCYYESRILGAHHGLISTYALEILVLYIFHLFHGTLDGPLAVLYRFLDYYSKFDWDNKGISLYGPISLSSLPELVTDSPDTVNDDFTMREDFLKECAQWFTVLPRNSEKNTQVFPRKFFNIVDPLKQSNNLGRSVSKGNFLRIRSAFDFGARKLGKILQVPDNFTVDEVNQFFRNTLKRHCSRVRPDVQEIALDFNGERADNDSSPLYSNNSFGD…
OsNTP13	Os12g18530	MAYCEAGGPVGRSPPSGSGGGGRRKTLAEVMATRTPRPASIRPEATRAAEAAAREVLLRVAPTEEAERRRQDVVGYLRRLLGTALGCEVIAFGSVPLKSYLPDGDVDITVLGNTALDGACISDVHSILESEEQDSGAELEIKGLHFIDAEVKLIKCVIENIVVDISFNQIGGVSTLCFLELADRKVGKNHLFKRSIMLIKAWCYHESRILGAHHGLLSTYALETLVLYIFNIFHKSLHGPLEALYKFLEYFSKFDWDKYCISLNGPVLLSSLPSPAVEPSSIQDELLFGKKTLPEVSDGSNINFCLKHLNIIDPLKWSNNLGRSVSRGSFYRIRGALSFGAQKLGQILMLHSDLIPTEIFGFFANTLKRHGRGERSDVGNNDSIESLLDPEYALGKDAP…
