# Supplementary material for: Identification and Expression Analysis of the Nucleotidyl Transferase Protein (NTP) Family in Soybean (Glycine max) under Various Abiotic Stresses
Source: Int J Mol Sci. 2024 Jan 17;25(2):1115. doi: 10.3390/ijms25021115 (PMC10816777; doi:10.3390/ijms25021115)
Supplement: Supplementary file 1 [file ijms-25-01115-s001.zip › Table S3.xlsx]

## Sheet: Table S3a
Table S3a. Collinearity relationship of GmNTP genes in soybean.
Gene name	Gene ID	Gene name	Gene ID
GmNTP1	Glyma.02G235800	GmNTP5	Glyma.06G144300
GmNTP1	Glyma.02G235800	GmNTP11	Glyma.14G203800
GmNTP2	Glyma.03G020100	GmNTP9	Glyma.07G082200
GmNTP4	Glyma.04G189100	GmNTP7	Glyma.06G176600
GmNTP8	Glyma.07G056700	GmNTP12	Glyma.16G025800
GmNTP10	Glyma.11G222700	GmNTP14	Glyma.18G034900
GmNTP13	Glyma.16G055700	GmNTP15	Glyma.19G092300

## Sheet: TableS3b
Table S3b. Collinearity relationship of GmNTP genes in soybean with Arabidopsis and rice.
Gene name	Gene ID	Gene name	Gene ID
GmNTP1	Glyma.02G235800	AtNTP2	AT2G40520
GmNTP2	Glyma.03G020100	AtURT1	AT2G45620
GmNTP3	Glyma.03G032900	AtNTP9	AT4G00060
GmNTP5	Glyma.06G144300	AtNTP2	AT2G40520
GmNTP5	Glyma.06G144300	AtNTP7	AT3G56320
GmNTP8	Glyma.07G056700	AtNTP8	AT3G61690
GmNTP9	Glyma.07G082200	AtURT1	AT2G45620
GmNTP10	Glyma.11G222700	AtHESO1	AT2G39740
GmNTP11	Glyma.14G203800	AtNTP2	AT2G40520
GmNTP12	Glyma.16G025800	AtNTP8	AT3G61690
GmNTP14	Glyma.18G034900	AtHESO1	AT2G39740
GmNTP1	Glyma.02G235800	OsNTP11	Os11g02320
GmNTP5	Glyma.06G144300	OsNTP11	Os11g02320
GmNTP11	Glyma.14G203800	OsNTP11	Os11g02320
GmNTP11	Glyma.14G203800	OsNTP6	Os03g21850
