# Supplementary material for: Identification and Expression Analysis of the Nucleotidyl Transferase Protein (NTP) Family in Soybean (Glycine max) under Various Abiotic Stresses
Source: Int J Mol Sci. 2024 Jan 17;25(2):1115. doi: 10.3390/ijms25021115 (PMC10816777; doi:10.3390/ijms25021115)
Supplement: Supplementary file 1 [file ijms-25-01115-s001.zip › Table S4.xlsx]

## Sheet: Sheet1
Table S4. Ka/Ks ratios and selection types of NTP duplicated gene pairs.
Sequence	Method	Ka	Ks	Ka/Ks	Types of selection
GmNTP1-AtNTP2	MA	0.556974	2.553	0.218164	Purify selection
GmNTP1-GmNTP5	MA	0.714083	2.23718	0.319188	Purify selection
GmNTP1-GmNTP11	MA	0.0364502	0.0926708	0.39333	Purify selection
GmNTP1-OsNTP11	MA	0.576518	2.64614	0.217871	Purify selection
GmNTP2-AtURT1	MA	0.368138	3.32346	0.11077	Purify selection
GmNTP2-GmNTP9	MA	0.0324408	0.126211	0.257035	Purify selection
GmNTP3-AtNTP9	MA	0.30688	2.95807	0.103743	Purify selection
GmNTP4-GmNTP7	MA	0.0672775	0.170522	0.394539	Purify selection
GmNTP5-AtNTP2	MA	0.488938	2.95942	0.165214	Purify selection
GmNTP5-AtNTP7	MA	0.487818	3.21948	0.151521	Purify selection
GmNTP5-OsNTP11	MA	0.682738	2.41504	0.282702	Purify selection
GmNTP8-AtNTP8	MA	0.302988	3.14045	0.0964793	Purify selection
GmNTP8-GmNTP12	MA	0.0258504	0.0805002	0.321122	Purify selection
GmNTP9-AtURT1	MA	0.346157	3.50779	0.0986825	Purify selection
GmNTP10-AtHESO1	MA	0.43804	2.92896	0.149555	Purify selection
GmNTP10-GmNTP14	MA	0.0252155	0.164203	0.153563	Purify selection
GmNTP11-AtNTP2	MA	0.522776	2.68016	0.195054	Purify selection
GmNTP11-OsNTP6	MA	0.61621	2.57059	0.239715	Purify selection
GmNTP11-OsNTP11	MA	0.575946	2.68499	0.214506	Purify selection
GmNTP12-AtNTP8	MA	0.300115	2.58652	0.116031	Purify selection
GmNTP13-GmNTP15	MA	0.0422744	0.0959041	0.440798	Purify selection
GmNTP14-AtHESO1	MA	0.388945	3.05781	0.127197	Purify selection
