# Supplementary material for: Identification and Expression Analysis of the Nucleotidyl Transferase Protein (NTP) Family in Soybean (Glycine max) under Various Abiotic Stresses
Source: Int J Mol Sci. 2024 Jan 17;25(2):1115. doi: 10.3390/ijms25021115 (PMC10816777; doi:10.3390/ijms25021115)
Supplement: Supplementary file 1 [file ijms-25-01115-s001.zip › Table S5.xlsx]

## Sheet: Sheet1
Table S5. Secondary structure distribution ratio of NTP family genes in soybean, Arabidopsis and rice.
Gene name	Alpha helix	Beta turn	Random coil	Extended strand
GmNTP1	0.2711	0.0473146	0.554987	0.126598
GmNTP2	0.357045	0.0437756	0.500684	0.0984952
GmNTP3	0.299935	0.0394312	0.544279	0.116354
GmNTP4	0.310694	0.0231214	0.573699	0.0924855
GmNTP5	0.335645	0.0277393	0.538141	0.0984743
GmNTP6	0.332845	0.0381232	0.542522	0.0865103
GmNTP7	0.513298	0.0531915	0.327128	0.106383
GmNTP8	0.20015	0.0344828	0.682159	0.0832084
GmNTP9	0.36612	0.0409836	0.505464	0.0874317
GmNTP10	0.402198	0.0351648	0.468132	0.0945055
GmNTP11	0.239744	0.0397436	0.611538	0.108974
GmNTP12	0.2	0.0322097	0.68764	0.0801498
GmNTP13	0.311404	0.0277778	0.562865	0.0979532
GmNTP14	0.46988	0.0313253	0.39759	0.101205
GmNTP15	0.34697	0.0393939	0.534848	0.0787879
GmNTP16	0.345048	0.0271565	0.535144	0.0926518
AtHESO1	0.369863	0.0410959	0.510763	0.0861057
AtNTP2	0.386454	0.0478088	0.460159	0.105578
AtURT1	0.331152	0.0340314	0.558901	0.0746073
AtNTP4	0.379765	0.042522	0.442815	0.134897
AtNTP5	0.466245	0.0527426	0.377637	0.103376
AtNTP6	0.373134	0.0447761	0.485904	0.0961857
AtNTP7	0.25573	0.0373945	0.616405	0.0904704
AtNTP8	0.188028	0.0353031	0.693784	0.0828856
AtNTP9	0.302294	0.0391363	0.539136	0.118758
AtNTP10	0.258491	0.0301887	0.539623	0.171698
OsNTP1	0.307692	0.0384615	0.509615	0.139423
OsNTP2	0.339144	0.044374	0.486529	0.129952
OsNTP3	0.525	0.0583333	0.345833	0.108333
OsNTP4	0.29097	0.0685619	0.471572	0.167224
OsNTP5	0.195751	0.0295903	0.688164	0.0849772
OsNTP6	0.274131	0.0444015	0.564672	0.11583
OsNTP7	0.287155	0.0457297	0.562878	0.104237
OsNTP8	0.24429	0.0347567	0.600794	0.119166
OsNTP9	0.383821	0.0361446	0.473322	0.104991
OsNTP10	0.461059	0.0436137	0.364486	0.127726
OsNTP11	0.261845	0.0399002	0.589776	0.107232
OsNTP12	0.245636	0.0436409	0.609726	0.0997506
OsNTP13	0.258586	0.0353535	0.579798	0.125253
