# Supplementary material for: Identification and Expression Analysis of the Nucleotidyl Transferase Protein (NTP) Family in Soybean (Glycine max) under Various Abiotic Stresses
Source: Int J Mol Sci. 2024 Jan 17;25(2):1115. doi: 10.3390/ijms25021115 (PMC10816777; doi:10.3390/ijms25021115)
Supplement: Supplementary file 1 [file ijms-25-01115-s001.zip › Table S6.xlsx]

## Sheet: Sheet 1
Table S6. The distribution of conserved domains of NTP family genes in soybean, Arabidopsis and rice.
Gene name	Start (bp)	End (bp)	Domain
GmNTP1	81	139	NTP_transf_2
GmNTP2	436	524	NTP_transf_2
GmNTP2	630	689	PAP_assoc
GmNTP3	1202	1244	NTP_transf_2
GmNTP4	61	123	NTP_transf_2
GmNTP5	51	133	NTP_transf_2
GmNTP6	125	214	NTP_transf_2
GmNTP7	55	122	NTP_transf_2
GmNTP8	78	145	NTP_transf_2
GmNTP9	438	525	NTP_transf_2
GmNTP9	631	690	PAP_assoc
GmNTP10	37	134	NTP_transf_2
GmNTP11	81	139	NTP_transf_2
GmNTP12	78	145	NTP_transf_2
GmNTP13	60	127	NTP_transf_2
GmNTP14	36	135	NTP_transf_2
GmNTP15	70	140	NTP_transf_2
GmNTP16	51	130	NTP_transf_2
AtHESO1	37	76	NTP_transf_2
AtNTP2	69	116	NTP_transf_2
AtURT1	462	536	NTP_transf_2
AtURT1	656	714	PAP_assoc
AtNTP4	89	177	NTP_transf_2
AtNTP5	89	171	NTP_transf_2
AtNTP6	80	120	NTP_transf_2
AtNTP7	75	114	NTP_transf_2
AtNTP8	78	149	NTP_transf_2
AtNTP9	1137	1181	NTP_transf_2
AtNTP10	154	249	NTP_transf_2
AtNTP10	309	367	PAP_assoc
OsNTP1	8	42	NTP_transf_2
OsNTP2	221	308	NTP_transf_2
OsNTP2	387	445	PAP_assoc
OsNTP3	54	222	NTP_transf_2
OsNTP4	299	394	NTP_transf_2
OsNTP4	495	554	PAP_assoc
OsNTP5	65	133	NTP_transf_2
OsNTP6	74	141	NTP_transf_2
OsNTP7	1137	1179	NTP_transf_2
OsNTP7	1378	1430	PAP_assoc
OsNTP8	86	117	NTP_transf_2
OsNTP9	106	190	NTP_transf_2
OsNTP10	26	111	NTP_transf_2
OsNTP10	216	274	PAP_assoc
OsNTP11	72	129	NTP_transf_2
OsNTP11	227	313	PAP_assoc
OsNTP12	72	129	NTP_transf_2
OsNTP12	227	313	PAP_assoc
OsNTP13	86	123	NTP_transf_2
