# Supplementary material for: Identification and Expression Analysis of the Nucleotidyl Transferase Protein (NTP) Family in Soybean (Glycine max) under Various Abiotic Stresses
Source: Int J Mol Sci. 2024 Jan 17;25(2):1115. doi: 10.3390/ijms25021115 (PMC10816777; doi:10.3390/ijms25021115)
Supplement: Supplementary file 1 [file ijms-25-01115-s001.zip › Table S7.xlsx]

## Sheet: Sheet1
Table S7. GO functional annotation of GmNTP proteins.
Group	GO Id	GO term description	Gene count	Background count	P-value	Matching proteins in network (IDs)
BP	GO:0031499	TRAMP complex	11	14	4.25e-32	GmNTP15,GmNTP3,GmNTP1,GmNTP8,GmNTP4,GmNTP5,GmNTP7,GmNTP11,GmNTP12,GmNTP13,GmNTP16
BP	GO:0005730	Nucleolus	11	694	2.23e-15	GmNTP15,GmNTP3,GmNTP1,GmNTP8,GmNTP4,GmNTP5,GmNTP7,GmNTP11,GmNTP12,GmNTP13,GmNTP16
BP	GO:0043232	Intracellular non-membrane-bounded organelle	15	3593	6.25e-15	GmNTP15,GmNTP3,GmNTP1,GmNTP2,GmNTP8,GmNTP10,GmNTP4,GmNTP5,GmNTP7,GmNTP9,GmNTP11,GmNTP12,GmNTP13,GmNTP14,GmNTP16
BP	GO:0000932	P-body	4	145	7.8e-06	GmNTP2,GmNTP10,GmNTP9,GmNTP14
BP	GO:0005634	Nucleus	13	12516	6.5e-05	GmNTP15,GmNTP3,GmNTP1,GmNTP8,GmNTP10,GmNTP4,GmNTP5,GmNTP7,GmNTP11,GmNTP12,GmNTP13,GmNTP14,GmNTP16
BP	GO:0005622	Intracellular anatomical structure	16	32680	0.0107	GmNTP15,GmNTP3,GmNTP1,GmNTP2,GmNTP8,GmNTP10,GmNTP4,GmNTP5,GmNTP6,GmNTP7,GmNTP9,GmNTP11,GmNTP12,GmNTP13,GmNTP14,GmNTP16
MF	GO:0016779	Nucleotidyltransferase activity	14	393	2.92e-25	GmNTP15,GmNTP3,GmNTP2,GmNTP8,GmNTP10,GmNTP4,GmNTP5,GmNTP6,GmNTP7,GmNTP9,GmNTP12,GmNTP13,GmNTP14,GmNTP16
MF	GO:0004652	Polynucleotide adenylyltransferase activity	7	19	2.9e-17	GmNTP15,GmNTP3,GmNTP4,GmNTP5,GmNTP7,GmNTP13,GmNTP16
MF	GO:0050265	RNA uridylyltransferase activity	4	4	1.63e-10	GmNTP2,GmNTP10,GmNTP9,GmNTP14
MF	GO:0003729	mRNA binding	6	1338	0.00041	GmNTP1,GmNTP2,GmNTP8,GmNTP9,GmNTP11,GmNTP12
CC	GO:0031123	RNA 3-end processing	16	162	2.74e-37	GmNTP15,GmNTP3,GmNTP1,GmNTP2,GmNTP8,GmNTP10,GmNTP4,GmNTP5,GmNTP6,GmNTP7,GmNTP9,GmNTP11,GmNTP12,GmNTP13,GmNTP14,GmNTP16
CC	GO:0043631	RNA polyadenylation	11	59	5.51e-26	GmNTP15,GmNTP3,GmNTP1,GmNTP8,GmNTP4,GmNTP5,GmNTP7,GmNTP11,GmNTP12,GmNTP13,GmNTP16
CC	GO:0071076	RNA 3 uridylation	4	4	1.27e-10	GmNTP2,GmNTP10,GmNTP9,GmNTP14
CC	GO:0060964	Regulation of miRNA-mediated gene silencing	4	6	3.51e-10	GmNTP2,GmNTP10,GmNTP9,GmNTP14
CC	GO:0060965	Negative regulation of miRNA-mediated gene silencing	2	2	0.0001	GmNTP2,GmNTP9
CC	GO:0070921	Regulation of siRNA production	2	2	0.0001	GmNTP2,GmNTP9
CC	GO:0000289	Nuclear-transcribed mRNA poly(A) tail shortening	2	22	0.0035	GmNTP2,GmNTP9
