# Supplementary material for: Identification and Expression Analysis of the Nucleotidyl Transferase Protein (NTP) Family in Soybean (Glycine max) under Various Abiotic Stresses
Source: Int J Mol Sci. 2024 Jan 17;25(2):1115. doi: 10.3390/ijms25021115 (PMC10816777; doi:10.3390/ijms25021115)
Supplement: Supplementary file 1 [file ijms-25-01115-s001.zip › Table S8.xlsx]

## Sheet: Sheet1
Table S8. The number of cis-acting elements of NTP family genes in soybean, Arabidopsis and rice.
Groups	Phytohormne resposive								Stress responses
Function	Abscisic acid responsiveness	Auxin responsiveness	Gibberellin responsiveness			MeJA responsiveness		Salicylic acid responsiveness	Anaerobic induction	Defense and stress responsiveness	Drought responsiveness	Light responsiveness																							Low-temperature responsiveness	Wound-responsive
Gene name	ABRE	AuxRR-core	GARE-motif	P-box	TATC-box	CGTCA-motif	TGACG-motif	TCA-element	ARE	TC-rich repeats	MBS	3-AF1 binding site	ACE	AE-box	AT1-motif	ATC-motif	ATCT-motif	Box 4	Box II	chs-CMA1a	chs-CMA2a	GA-motif	Gap-box	GATA-motif	G-box	GT1-motif	GTGGC-motif	I-box	LAMP-element	L-box	MRE	Sp1	TCCC-motif	TCT-motif	LTR	WUN-motif
GmNTP1	2					1	1		4	1			1	1				4							1	1							1
GmNTP2	1	1							3	1						1		3							1			2					1	1
GmNTP3	3					1	1		1	1	2							5		1					1						1	1		2
GmNTP4						1	1			2								2						1										1
GmNTP5		1			1	2	2	1	3	1	2						1	1				1				3	1			1			1	2	1
GmNTP6	1					2	2		4				1					3							2	1								1
GmNTP7						3	3			1	2				1		1	1								1								1	1
GmNTP8	1	3		1													1	1								2		1				2	1	1
GmNTP9	1							1	2			1						3						1	1			2
GmNTP10	1	1							3		1			1	1			3							1										1
GmNTP11									1									3					1			2								1
GmNTP12	4	1		1		1	1	2									1	1							4	1									2
GmNTP13	6		1	2		2	2	1					1				1			1					6	2									1
GmNTP14	3			1		1	1		1	1				1				6				1		1	4											1
GmNTP15									1						1			6		1				1
GmNTP16	1		1			2	2		5		1			1			1	1		1					2
AtHESO1				1				1	1	1						1		7		1														1
AtNTP2						1	1		1	3		1		1				2															2	1	1
AtURT1	3			1		2	2		1	2								1		1					4	3								1
AtNTP4			1	1		1	1	2	2									1										1						1	1
AtNTP5	1					1	1		4	1	1						1	1							2						1			1		1
AtNTP6	3		1			2	2		3		1		1	2				2							4	1		2							1
AtNTP7	4					2	2		2															1	4
AtNTP8	7		1			3	3		5									1							9						1	1		1	1
AtNTP9	2					2	2		2		1	1		1				1							2	1		1					1	1	1
AtNTP10	2		1	1		1	1		2					1				3			1			3	1	3			1					1
OsNTP1	5			1		3	3		2																7							2	1
OsNTP2											1							1						1	1	1		1				1	1	2	1
OsNTP3	4					2	2	1	4									2							5						1				1
OsNTP4	3					1	1	1		1		1	1					2					1		2	3		1					1	2	1
OsNTP5	2								5									2							2							1	1	1	1
OsNTP6	1		1			1	1		2	1	1									1		1		1		1		1			1			2
OsNTP7	3					2	2			1	2														6	2						1
OsNTP8		1		1		2	2										1	4		1						1		3				1
OsNTP9						1	1					1									1			2		1		1	1					1
OsNTP10	4					1	1		3				1												2							3	1		1
OsNTP11	2								2									1							3								1
OsNTP12			1			1	1				1													1	1	1						6		1	1
OsNTP13	3		1			3	3												2						5	1		1				3
total	73	8	9	11	1	48	48	10	69	18	16	5	6	9	3	2	8	74	2	8	2	3	2	13	83	32	1	17	2	1	5	22	13	27	17	2
