# Supplementary material for: Identification and Expression Analysis of the Nucleotidyl Transferase Protein (NTP) Family in Soybean (Glycine max) under Various Abiotic Stresses
Source: Int J Mol Sci. 2024 Jan 17;25(2):1115. doi: 10.3390/ijms25021115 (PMC10816777; doi:10.3390/ijms25021115)
Supplement: Supplementary file 1 [file ijms-25-01115-s001.zip › Table S9.xlsx]

## Sheet: Sheet1
Table S9. The number and length of introns and exons across different NTP genes
Gene name	GeneID	Chr ID	Gene Range	Num of mRNA	mRNA ID	mRNA Range	Num of Exon	Exon Range	Num of Intron	Intron Range	Num of CDS	CDS Range	Num of UTR	UTR Range
GmNTP1	Glyma.02G235800	Chr02	42321668:42331137	3	Glyma.02G235800.1	42321718:42331137	9	42321718:42322157,42323608:42324044,42324181:42325028,42326836:42327018,42327094:42327196,42327325:42327507,42327865:42327957,42328677:42328862,42330586:42331137	8	42322158:42323607,42324045:42324180,42325029:42326835,42327019:42327093,42327197:42327324,42327508:42327864,42327958:42328676,42328863:42330585	9	42322091:42322157,42323608:42324044,42324181:42325028,42326836:42327018,42327094:42327196,42327325:42327507,42327865:42327957,42328677:42328862,42330586:42330834	2	42330835:42331137,42321718:42322090
GmNTP2	Glyma.03G020100	Chr03	2057797:2063029	1	Glyma.03G020100.1	2057797:2063029	6	2057797:2058279,2058473:2058669,2059140:2059203,2059386:2059609,2061076:2061447,2061788:2063029	5	2058280:2058472,2058670:2059139,2059204:2059385,2059610:2061075,2061448:2061787	6	2058069:2058279,2058473:2058669,2059140:2059203,2059386:2059609,2061076:2061447,2061788:2062915	2	2062916:2063029,2057797:2058068
GmNTP3	Glyma.03G032900	Chr03	3811206:3826408	1	Glyma.03G032900.1	3811206:3826408	20	3811206:3812258,3814368:3814910,3815003:3815122,3815204:3817165,3817240:3817356,3817664:3817846,3817945:3818007,3818611:3818682,3818791:3819051,3819959:3820078,3820576:3820635,3820945:3820985,3821091:3821168,3821251:3821335,3822601:3822767,3822882:3824065,3824310:3824654,3824741:3824821,3825349:3825428,3826070:3826408	19	3812259:3814367,3814911:3815002,3815123:3815203,3817166:3817239,3817357:3817663,3817847:3817944,3818008:3818610,3818683:3818790,3819052:3819958,3820079:3820575,3820636:3820944,3820986:3821090,3821169:3821250,3821336:3822600,3822768:3822881,3824066:3824309,3824655:3824740,3824822:3825348,3825429:3826069	15	3811446:3812258,3814368:3814910,3815003:3815122,3815204:3817165,3817240:3817356,3817664:3817846,3817945:3818007,3818611:3818682,3818791:3819051,3819959:3820078,3820576:3820635,3820945:3820985,3821091:3821168,3821251:3821335,3822601:3822726	7	3811206:3811445,3822727:3822767,3822882:3824065,3824310:3824654,3824741:3824821,3825349:3825428,3826070:3826408
GmNTP4	Glyma.04G189100	Chr04	46001963:46009715	5	Glyma.04G189100.1	46001963:46009715	10	46001963:46002959,46003288:46003745,46004191:46004373,46004455:46004557,46004659:46004841,46005615:46005707,46005882:46006058,46008862:46009101,46009448:46009521,46009598:46009715	9	46002960:46003287,46003746:46004190,46004374:46004454,46004558:46004658,46004842:46005614,46005708:46005881,46006059:46008861,46009102:46009447,46009522:46009597	8	46002279:46002959,46003288:46003745,46004191:46004373,46004455:46004557,46004659:46004841,46005615:46005707,46005882:46006058,46008862:46009062	4	46009063:46009101,46009448:46009521,46009598:46009715,46001963:46002278
GmNTP5	Glyma.06G144300	Chr06	11748132:11753509	4	Glyma.06G144300.1	11748258:11753509	9	11748258:11748446,11749150:11749393,11749925:11750101,11750256:11750348,11750901:11751083,11751185:11751287,11751371:11751553,11751964:11752475,11752563:11753509	8	11748447:11749149,11749394:11749924,11750102:11750255,11750349:11750900,11751084:11751184,11751288:11751370,11751554:11751963,11752476:11752562	8	11749193:11749393,11749925:11750101,11750256:11750348,11750901:11751083,11751185:11751287,11751371:11751553,11751964:11752475,11752563:11753276	3	11748258:11748446,11749150:11749192,11753277:11753509
GmNTP6	Glyma.06G158600	Chr06	13038185:13055830	1	Glyma.06G158600.1	13038185:13055830	10	13038185:13039690,13039780:13039878,13042173:13042279,13044532:13044577,13046410:13046505,13047123:13047307,13049742:13049915,13053053:13053241,13055422:13055462,13055647:13055830	9	13039691:13039779,13039879:13042172,13042280:13044531,13044578:13046409,13046506:13047122,13047308:13049741,13049916:13053052,13053242:13055421,13055463:13055646	10	13039607:13039690,13039780:13039878,13042173:13042279,13044532:13044577,13046410:13046505,13047123:13047307,13049742:13049915,13053053:13053241,13055422:13055462,13055647:13055756	2	13055757:13055830,13038185:13039606
GmNTP7	Glyma.06G176600	Chr06	14933790:14940892	2	Glyma.06G176600.1	14933790:14940892	10	14933790:14933870,14933996:14934047,14934216:14934452,14936933:14937109,14937284:14937376,14938164:14938346,14938436:14938538,14938618:14938800,14939237:14939697,14940030:14940892	9	14933871:14933995,14934048:14934215,14934453:14936932,14937110:14937283,14937377:14938163,14938347:14938435,14938539:14938617,14938801:14939236,14939698:14940029	8	14934252:14934452,14936933:14937109,14937284:14937376,14938164:14938346,14938436:14938538,14938618:14938800,14939237:14939697,14940030:14940677	4	14933790:14933870,14933996:14934047,14934216:14934251,14940678:14940892
GmNTP8	Glyma.07G056700	Chr07	5026549:5035201	4	Glyma.07G056700.1	5026549:5035201	9	5026549:5027101,5027849:5028438,5028611:5031012,5031642:5031827,5031927:5032029,5032110:5032292,5032448:5032540,5033548:5033736,5034191:5035201	8	5027102:5027848,5028439:5028610,5031013:5031641,5031828:5031926,5032030:5032109,5032293:5032447,5032541:5033547,5033737:5034190	9	5027077:5027101,5027849:5028438,5028611:5031012,5031642:5031827,5031927:5032029,5032110:5032292,5032448:5032540,5033548:5033736,5034191:5034424	2	5034425:5035201,5026549:5027076
GmNTP9	Glyma.07G082200	Chr07	7549036:7554463	3	Glyma.07G082200.1	7549036:7554463	6	7549036:7549482,7549748:7549944,7550417:7550480,7550660:7550883,7552548:7552919,7553252:7554463	5	7549483:7549747,7549945:7550416,7550481:7550659,7550884:7552547,7552920:7553251	6	7549272:7549482,7549748:7549944,7550417:7550480,7550660:7550883,7552548:7552919,7553252:7554382	2	7554383:7554463,7549036:7549271
GmNTP10	Glyma.11G222700	Chr11	31776993:31783480	2	Glyma.11G222700.1	31776993:31783480	9	31776993:31777758,31777954:31778064,31778387:31778517,31779786:31779855,31780138:31780233,31780312:31780490,31781463:31781627,31782358:31782640,31783284:31783480	8	31777759:31777953,31778065:31778386,31778518:31779785,31779856:31780137,31780234:31780311,31780491:31781462,31781628:31782357,31782641:31783283	8	31777282:31777758,31777954:31778064,31778387:31778517,31779786:31779855,31780138:31780233,31780312:31780490,31781463:31781627,31782358:31782496	3	31782497:31782640,31783284:31783480,31776993:31777281
GmNTP11	Glyma.14G203800	Chr14	46841491:46853116	2	Glyma.14G203800.1	46841491:46853116	9	46841491:46841854,46843324:46843757,46843867:46844714,46846477:46846659,46846736:46846838,46846966:46847148,46847458:46847550,46848231:46848416,46852475:46853116	8	46841855:46843323,46843758:46843866,46844715:46846476,46846660:46846735,46846839:46846965,46847149:46847457,46847551:46848230,46848417:46852474	9	46841791:46841854,46843324:46843757,46843867:46844714,46846477:46846659,46846736:46846838,46846966:46847148,46847458:46847550,46848231:46848416,46852475:46852723	2	46852724:46853116,46841491:46841790
GmNTP12	Glyma.16G025800	Chr16	2499822:2508300	2	Glyma.16G025800.1	2499822:2508300	9	2499822:2500401,2501135:2501724,2501899:2504318,2505023:2505208,2505305:2505407,2505488:2505670,2505794:2505886,2506545:2506733,2507215:2508300	8	2500402:2501134,2501725:2501898,2504319:2505022,2505209:2505304,2505408:2505487,2505671:2505793,2505887:2506544,2506734:2507214	9	2500392:2500401,2501135:2501724,2501899:2504318,2505023:2505208,2505305:2505407,2505488:2505670,2505794:2505886,2506545:2506733,2507215:2507448	2	2507449:2508300,2499822:2500391
GmNTP13	Glyma.16G055700	Chr16	5450641:5458545	1	Glyma.16G055700.1	5450641:5458545	12	5450641:5450736,5450820:5450918,5451018:5452426,5452754:5453220,5453667:5453849,5453928:5454030,5454132:5454314,5454898:5454990,5455169:5455345,5456367:5456564,5456907:5457077,5458378:5458545	11	5450737:5450819,5450919:5451017,5452427:5452753,5453221:5453666,5453850:5453927,5454031:5454131,5454315:5454897,5454991:5455168,5455346:5456366,5456565:5456906,5457078:5458377	8	5451776:5452426,5452754:5453220,5453667:5453849,5453928:5454030,5454132:5454314,5454898:5454990,5455169:5455345,5456367:5456564	5	5456907:5457077,5458378:5458545,5450641:5450736,5450820:5450918,5451018:5451775
GmNTP14	Glyma.18G034900	Chr18	2709990:2718146	11	Glyma.18G034900.1	2710004:2718060	9	2710004:2710304,2712774:2713056,2714172:2714336,2715275:2715453,2715528:2715623,2715902:2715971,2716559:2716689,2717014:2717124,2717312:2718060	8	2710305:2712773,2713057:2714171,2714337:2715274,2715454:2715527,2715624:2715901,2715972:2716558,2716690:2717013,2717125:2717311	8	2712918:2713056,2714172:2714336,2715275:2715453,2715528:2715623,2715902:2715971,2716559:2716689,2717014:2717124,2717312:2717668	3	2710004:2710304,2712774:2712917,2717669:2718060
GmNTP15	Glyma.19G092300	Chr19	32756629:32763832	4	Glyma.19G092300.1	32756641:32763825	9	32756641:32756820,32758285:32758484,32759656:32759832,32760012:32760104,32760862:32761044,32761146:32761248,32761313:32761513,32762010:32762476,32762804:32763825	8	32756821:32758284,32758485:32759655,32759833:32760011,32760105:32760861,32761045:32761145,32761249:32761312,32761514:32762009,32762477:32762803	9	32756793:32756820,32758285:32758484,32759656:32759832,32760012:32760104,32760862:32761044,32761146:32761248,32761313:32761513,32762010:32762476,32762804:32763334	2	32756641:32756792,32763335:32763825
GmNTP16	Glyma.19G092500	Chr19	32789367:32794238	1	Glyma.19G092500.1	32789367:32794238	8	32789367:32790285,32790366:32790877,32791295:32791477,32791561:32791663,32791761:32791943,32792428:32792520,32792692:32792868,32794026:32794238	7	32790286:32790365,32790878:32791294,32791478:32791560,32791664:32791760,32791944:32792427,32792521:32792691,32792869:32794025	8	32789857:32790285,32790366:32790877,32791295:32791477,32791561:32791663,32791761:32791943,32792428:32792520,32792692:32792868,32794026:32794226	2	32794227:32794238,32789367:32789856
AtHESO1	AT2G39740	Chr2	16575752:16579120	1	AT2G39740.1	16575752:16579120	9	16575752:16575928,16576237:16576388,16576655:16576819,16576963:16577141,16577233:16577328,16577432:16577501,16577598:16577728,16577842:16577952,16578060:16579120	8	16575929:16576236,16576389:16576654,16576820:16576962,16577142:16577232,16577329:16577431,16577502:16577597,16577729:16577841,16577953:16578059	8	16576250:16576388,16576655:16576819,16576963:16577141,16577233:16577328,16577432:16577501,16577598:16577728,16577842:16577952,16578060:16578704	3	16575752:16575928,16576237:16576249,16578705:16579120
AtNTP2	AT2G40520	Chr2	16922587:16925914	4	AT2G40520.1	16923068:16925914	9	16923068:16923194,16923499:16923765,16923884:16924063,16924165:16924257,16924341:16924523,16924598:16924700,16924779:16924952,16925034:16925482,16925574:16925914	8	16923195:16923498,16923766:16923883,16924064:16924164,16924258:16924340,16924524:16924597,16924701:16924778,16924953:16925033,16925483:16925573	8	16923541:16923765,16923884:16924063,16924165:16924257,16924341:16924523,16924598:16924700,16924779:16924952,16925034:16925482,16925574:16925675	3	16923068:16923194,16923499:16923540,16925676:16925914
AtURT1	AT2G45620	Chr2	18792864:18795904	1	AT2G45620.1	18792864:18795904	6	18792864:18794148,18794308:18794676,18794785:18795008,18795090:18795153,18795234:18795430,18795516:18795904	5	18794149:18794307,18794677:18794784,18795009:18795089,18795154:18795233,18795431:18795515	6	18792943:18794148,18794308:18794676,18794785:18795008,18795090:18795153,18795234:18795430,18795516:18795750	2	18792864:18792942,18795751:18795904
AtNTP4	AT3G45750	Chr3	16793611:16797947	2	AT3G45750.1	16793611:16797933	10	16793611:16794946,16795037:16795141,16795237:16795343,16795597:16795642,16795956:16796051,16796438:16796622,16796784:16796963,16797048:16797236,16797332:16797412,16797771:16797933	9	16794947:16795036,16795142:16795236,16795344:16795596,16795643:16795955,16796052:16796437,16796623:16796783,16796964:16797047,16797237:16797331,16797413:16797770	9	16793855:16794946,16795037:16795141,16795237:16795343,16795597:16795642,16795956:16796051,16796438:16796622,16796784:16796963,16797048:16797236,16797332:16797380	3	16797381:16797412,16797771:16797933,16793611:16793854
AtNTP5	AT3G45760	Chr3	16801996:16804967	2	AT3G45760.1	16801996:16804759	9	16801996:16802128,16802341:16802780,16803062:16803168,16803298:16803343,16803599:16803694,16803808:16803992,16804151:16804330,16804420:16804608,16804711:16804759	8	16802129:16802340,16802781:16803061,16803169:16803297,16803344:16803598,16803695:16803807,16803993:16804150,16804331:16804419,16804609:16804710	9	16801996:16802128,16802341:16802780,16803062:16803168,16803298:16803343,16803599:16803694,16803808:16803992,16804151:16804330,16804420:16804608,16804711:16804759	0
AtNTP6	AT3G51620	Chr3	19143652:19148242	2	AT3G51620.1	19143652:19148242	8	19143652:19144086,19144440:19144625,19144776:19144868,19145494:19145596,19145679:19145864,19146251:19147317,19147397:19147782,19147873:19148242	7	19144087:19144439,19144626:19144775,19144869:19145493,19145597:19145678,19145865:19146250,19147318:19147396,19147783:19147872	8	19143859:19144086,19144440:19144625,19144776:19144868,19145494:19145596,19145679:19145864,19146251:19147317,19147397:19147782,19147873:19147891	2	19143652:19143858,19147892:19148242
AtNTP7	AT3G56320	Chr3	20885894:20889656	1	AT3G56320.1	20885894:20889656	10	20885894:20886534,20886625:20887106,20887182:20887364,20887464:20887566,20887645:20887827,20887933:20888025,20888115:20888294,20888379:20888707,20889150:20889218,20889496:20889656	9	20886535:20886624,20887107:20887181,20887365:20887463,20887567:20887644,20887828:20887932,20888026:20888114,20888295:20888378,20888708:20889149,20889219:20889495	8	20886193:20886534,20886625:20887106,20887182:20887364,20887464:20887566,20887645:20887827,20887933:20888025,20888115:20888294,20888379:20888624	4	20888625:20888707,20889150:20889218,20889496:20889656,20885894:20886192
AtNTP8	AT3G61690	Chr3	22827884:22834048	1	AT3G61690.1	22827884:22834048	9	22827884:22828594,22828675:22828863,22829000:22829092,22829189:22829371,22829451:22829553,22829648:22829833,22830014:22832346,22832780:22833348,22833468:22834048	8	22828595:22828674,22828864:22828999,22829093:22829188,22829372:22829450,22829554:22829647,22829834:22830013,22832347:22832779,22833349:22833467	9	22828349:22828594,22828675:22828863,22829000:22829092,22829189:22829371,22829451:22829553,22829648:22829833,22830014:22832346,22832780:22833348,22833468:22833477	2	22827884:22828348,22833478:22834048
AtNTP9	AT4G00060	Chr4	21437:28871	1	AT4G00060.1	21437:28871	18	21437:22297,22687:23199,23274:23384,23458:25218,25294:25410,25559:25741,25818:25880,26339:26410,26501:26752,26884:27003,27219:27278,27383:27423,27522:27599,27688:27772,27868:28019,28156:28281,28373:28574,28644:28871	17	22298:22686,23200:23273,23385:23457,25219:25293,25411:25558,25742:25817,25881:26338,26411:26500,26753:26883,27004:27218,27279:27382,27424:27521,27600:27687,27773:27867,28020:28155,28282:28372,28575:28643	15	21437:22297,22687:23199,23274:23384,23458:25218,25294:25410,25559:25741,25818:25880,26339:26410,26501:26752,26884:27003,27219:27278,27383:27423,27522:27599,27688:27772,27868:27996	4	27997:28019,28156:28281,28373:28574,28644:28871
AtNTP10	AT5G53770	Chr5	21826656:21829983	1	AT5G53770.1	21826656:21829983	13	21826656:21827102,21827329:21827441,21827535:21827591,21827711:21827806,21827884:21827954,21828248:21828290,21828422:21828502,21828596:21828655,21828756:21828806,21828890:21828987,21829121:21829169,21829265:21829309,21829400:21829983	12	21827103:21827328,21827442:21827534,21827592:21827710,21827807:21827883,21827955:21828247,21828291:21828421,21828503:21828595,21828656:21828755,21828807:21828889,21828988:21829120,21829170:21829264,21829310:21829399	13	21826733:21827102,21827329:21827441,21827535:21827591,21827711:21827806,21827884:21827954,21828248:21828290,21828422:21828502,21828596:21828655,21828756:21828806,21828890:21828987,21829121:21829169,21829265:21829309,21829400:21829858	2	21826656:21826732,21829859:21829983
OsNTP1	Os01g44350	Chr1	25445246:25445869	1	Os01g44350.1	25445246:25445869	1	25445246:25445869	0		1	25445246:25445869	0
OsNTP2	Os01g48210	Chr1	27624620:27630362	2	Os01g48210.1	27624620:27630362	13	27624620:27625290,27625702:27625814,27625911:27625967,27626519:27626614,27626926:27626996,27627085:27627127,27627244:27627324,27627426:27627485,27627760:27627825,27628100:27628197,27628536:27628584,27628675:27628719,27629587:27630362	12	27625291:27625701,27625815:27625910,27625968:27626518,27626615:27626925,27626997:27627084,27627128:27627243,27627325:27627425,27627486:27627759,27627826:27628099,27628198:27628535,27628585:27628674,27628720:27629586	13	27624702:27625290,27625702:27625814,27625911:27625967,27626519:27626614,27626926:27626996,27627085:27627127,27627244:27627324,27627426:27627485,27627760:27627825,27628100:27628197,27628536:27628584,27628675:27628719,27629587:27630111	2	27624620:27624701,27630112:27630362
OsNTP3	Os01g62790	Chr1	36359709:36365493	2	Os01g62790.1	36359709:36365493	8	36359709:36359903,36361072:36361234,36362522:36362683,36363020:36363198,36363273:36363368,36363460:36363755,36364335:36364442,36364547:36365493	7	36359904:36361071,36361235:36362521,36362684:36363019,36363199:36363272,36363369:36363459,36363756:36364334,36364443:36364546	5	36361081:36361234,36362522:36362683,36363020:36363198,36363273:36363368,36363460:36363672	5	36359709:36359903,36361072:36361080,36363673:36363755,36364335:36364442,36364547:36365493
OsNTP4	Os02g02970	Chr2	1162143:1165062	1	Os02g02970.1	1162143:1165062	6	1162143:1162866,1162940:1163317,1163606:1163829,1163929:1163992,1164521:1164717,1164849:1165062	5	1162867:1162939,1163318:1163605,1163830:1163928,1163993:1164520,1164718:1164848	6	1162150:1162866,1162940:1163317,1163606:1163829,1163929:1163992,1164521:1164717,1164849:1165062	1	1162143:1162149
OsNTP5	Os03g11240	Chr3	5779594:5788833	1	Os03g11240.1	5779594:5788833	9	5779594:5780223,5781693:5782279,5783134:5785541,5786138:5786326,5786417:5786519,5786593:5786775,5786898:5786990,5787537:5787725,5788639:5788833	8	5780224:5781692,5782280:5783133,5785542:5786137,5786327:5786416,5786520:5786592,5786776:5786897,5786991:5787536,5787726:5788638	9	5780220:5780223,5781693:5782279,5783134:5785541,5786138:5786326,5786417:5786519,5786593:5786775,5786898:5786990,5787537:5787725,5788639:5788833	1	5779594:5780219
OsNTP6	Os03g21850	Chr3	12492932:12500194	2	Os03g21850.1	12492932:12500194	9	12492932:12493274,12495270:12495455,12495705:12495797,12495988:12496170,12496282:12496384,12496471:12496641,12496862:12498030,12498261:12499171,12499654:12500194	8	12493275:12495269,12495456:12495704,12495798:12495987,12496171:12496281,12496385:12496470,12496642:12496861,12498031:12498260,12499172:12499653	9	12493050:12493274,12495270:12495455,12495705:12495797,12495988:12496170,12496282:12496384,12496471:12496641,12496862:12498030,12498261:12499171,12499654:12499720	2	12492932:12493049,12499721:12500194
OsNTP7	Os06g45800	Chr6	27709820:27719175	1	Os06g45800.1	27709820:27719175	15	27709820:27709948,27710225:27710309,27710396:27710473,27710646:27710686,27710927:27710986,27711496:27711615,27712495:27712767,27712839:27712910,27713451:27713513,27713610:27713792,27714197:27714313,27714387:27716336,27716423:27716560,27716656:27716937,27718303:27719175	14	27709949:27710224,27710310:27710395,27710474:27710645,27710687:27710926,27710987:27711495,27711616:27712494,27712768:27712838,27712911:27713450,27713514:27713609,27713793:27714196,27714314:27714386,27716337:27716422,27716561:27716655,27716938:27718302	15	27709820:27709948,27710225:27710309,27710396:27710473,27710646:27710686,27710927:27710986,27711496:27711615,27712495:27712767,27712839:27712910,27713451:27713513,27713610:27713792,27714197:27714313,27714387:27716336,27716423:27716560,27716656:27716937,27718303:27719175	0
OsNTP8	Os07g48170	Chr7	28770335:28776325	1	Os07g48170.1	28770335:28776325	11	28770335:28770669,28770781:28771475,28771842:28772024,28772130:28773163,28773383:28773556,28773629:28773746,28773917:28774099,28774225:28774317,28774559:28774744,28775825:28776121,28776209:28776325	10	28770670:28770780,28771476:28771841,28772025:28772129,28773164:28773382,28773557:28773628,28773747:28773916,28774100:28774224,28774318:28774558,28774745:28775824,28776122:28776208	10	28770576:28770669,28770781:28771475,28771842:28772024,28772130:28773163,28773383:28773556,28773629:28773746,28773917:28774099,28774225:28774317,28774559:28774744,28775825:28776085	3	28776086:28776121,28776209:28776325,28770335:28770575
OsNTP9	Os08g44560	Chr8	28014058:28020255	1	Os08g44560.1	28014058:28020255	10	28014058:28014185,28014520:28014554,28015187:28015372,28016025:28016204,28016532:28016716,28016835:28016930,28017130:28017175,28017296:28017402,28018135:28018236,28018322:28020255	9	28014186:28014519,28014555:28015186,28015373:28016024,28016205:28016531,28016717:28016834,28016931:28017129,28017176:28017295,28017403:28018134,28018237:28018321	10	28014115:28014185,28014520:28014554,28015187:28015372,28016025:28016204,28016532:28016716,28016835:28016930,28017130:28017175,28017296:28017402,28018135:28018236,28018322:28019056	2	28014058:28014114,28019057:28020255
OsNTP10	Os10g11034	Chr10	6104485:6110305	1	Os10g11034.1	6104485:6110305	6	6104485:6104548,6105718:6106086,6107274:6107497,6107584:6107641,6109078:6109274,6109679:6110305	5	6104549:6105717,6106087:6107273,6107498:6107583,6107642:6109077,6109275:6109678	5	6105826:6106086,6107274:6107497,6107584:6107641,6109078:6109274,6109679:6109901	3	6104485:6104548,6105718:6105825,6109902:6110305
OsNTP11	Os11g02320	Chr11	663975:671701	3	Os11g02320.1	663975:671701	9	663975:664772,665077:665501,666046:667004,667659:667844,667940:668042,668139:668321,668512:668604,669090:669272,671074:671701	8	664773:665076,665502:666045,667005:667658,667845:667939,668043:668138,668322:668511,668605:669089,669273:671073	9	664715:664772,665077:665501,666046:667004,667659:667844,667940:668042,668139:668321,668512:668604,669090:669272,671074:671289	2	671290:671701,663975:664714
OsNTP12	Os12g02260	Chr12	707530:715414	2	Os12g02260.1	707530:715414	9	707530:708317,708626:709050,709663:710621,711223:711408,711502:711604,711701:711883,712072:712164,712650:712832,714751:715414	8	708318:708625,709051:709662,710622:711222,711409:711501,711605:711700,711884:712071,712165:712649,712833:714750	9	708260:708317,708626:709050,709663:710621,711223:711408,711502:711604,711701:711883,712072:712164,712650:712832,714751:714966	2	714967:715414,707530:708259
OsNTP13	Os12g18530	Chr12	10711881:10717818	1	Os12g18530.1	10711881:10717818	10	10711881:10712407,10712550:10713241,10713601:10713756,10713864:10714936,10715163:10715315,10715401:10715503,10715673:10715855,10715986:10716078,10716358:10716543,10717509:10717818	9	10712408:10712549,10713242:10713600,10713757:10713863,10714937:10715162,10715316:10715400,10715504:10715672,10715856:10715985,10716079:10716357,10716544:10717508	10	10712341:10712407,10712550:10713241,10713601:10713756,10713864:10714936,10715163:10715315,10715401:10715503,10715673:10715855,10715986:10716078,10716358:10716543,10717509:10717772	2	10717773:10717818,10711881:10712340
