# Supplementary material for: Identification and Expression Analysis of the Nucleotidyl Transferase Protein (NTP) Family in Soybean (Glycine max) under Various Abiotic Stresses
Source: Int J Mol Sci. 2024 Jan 17;25(2):1115. doi: 10.3390/ijms25021115 (PMC10816777; doi:10.3390/ijms25021115)
Supplement: Supplementary file 1 [file ijms-25-01115-s001.zip › Table S10.xlsx]

## Sheet: Table S10a
Table S10a. Tissue-specific expression data for GmNTP genes in soybean.
Groups	Aerial					Seed							Underground
Gene name	Young_leaf	Flower	POD_1cm	Pod_Shell_10DAF	Pod_shell_14DAF	Seed_10DAF	Seed_14DAF	Seed_21DAF	Seed_25DAF	Seed_28DAF	Seed_35DAF	Seed_42DAF	Root	Nodule
GmNTP1	5	8	5	6	4	2	4	4	3	2	4	2	7	4
GmNTP2	8	18	8	8	10	3	7	8	8	3	9	6	12	10
GmNTP3	6	7	5	4	2	2	3	3	3	1	3	2	4	3
GmNTP4	1	0	0	0	0	1	3	2	1	1	2	1	0	0
GmNTP5	0	0	0	0	0	0	1	0	0	0	0	0	0	0
GmNTP6	3	8	3	4	3	3	3	3	2	1	3	2	1	3
GmNTP7	7	0	0	0	0	1	2	2	1	1	1	0	0	0
GmNTP8	6	5	5	6	4	2	4	5	4	2	5	4	7	4
GmNTP9	7	15	9	9	7	5	8	13	13	8	18	12	14	12
GmNTP10	3	4	3	2	4	2	4	3	3	1	3	2	4	4
GmNTP11	3	7	5	3	2	2	2	3	3	1	3	2	3	4
GmNTP12	4	6	5	4	2	2	3	3	3	2	3	2	5	3
GmNTP13	2	6	4	2	3	1	2	4	2	1	2	1	5	2
GmNTP14	2	3	2	3	2	0	0	1	1	0	3	2	2	4
GmNTP15	1	3	1	1	1	1	1	1	1	0	1	1	0	2
GmNTP16	0	0	0	0	0	0	0	0	0	0	0	0	0	0

## Sheet: Table S10b
Table S10b. The expression level of GmNTP genes in soybean during different developmental stages.
Groups	Reproductive stages								Vegetative stages
Gene name	Floral_Bud	Globular	Heart	Cotyledon	Early_Maturation	Mid_maturation	Late_maturation	Dry	Leaf	Root	Stem	Seedling
GmNTP1	13.5046	29.065	17.0628	16.6947	7.47854	9.24526	46.1321	45.5475	9.13117	9.49449	7.83823	6.23691
GmNTP2	18.7545	25.9588	26.381	48.0942	12.6608	7.61498	29.4908	36.0743	8.25073	20.8294	18.2882	10.5029
GmNTP3	3.98983	11.9564	6.94696	8.33221	3.0343	3.77249	5.21009	5.09969	4.45497	3.86183	3.3217	2.44469
GmNTP4	0.28578	0.705764	6.46625	10.327	5.93711	2.99057	0.689034	0.417982	1.30184	0.018226	0	2.6315
GmNTP5	0.011893	0.115003	1.22181	1.87736	1.65433	0.062738	0.030595	0.195356	0.036156	0.069305	0.029867	0.04742
GmNTP6	7.60747	11.5201	11.2161	11.0133	4.25764	5.53151	13.6937	9.20849	3.98603	4.36151	3.51663	3.61801
GmNTP7	0.181517	0.213147	4.06749	4.68512	2.79698	3.58515	0.502565	0.277309	5.70831	0	0.256211	2.07852
GmNTP8	9.14086	17.6681	13.6817	14.6366	4.43262	8.23707	13.8733	7.1761	4.59985	7.1275	4.52382	4.12225
GmNTP9	19.402	33.7677	23.5935	36.9355	14.4636	17.0469	30.6549	19.0224	7.01274	23.6662	16.2951	10.2918
GmNTP10	9.84448	11.0579	20.235	17.0382	7.78651	8.69435	7.17838	9.12974	10.1122	10.888	6.62289	7.86714
GmNTP11	10.7269	21.0099	17.7902	16.6038	7.68559	7.70513	14.1798	18.0643	6.90235	9.17587	6.0371	5.14041
GmNTP12	8.65661	16.3252	12.8381	11.4385	4.16467	8.77118	12.0598	7.89331	4.38712	6.47536	4.75053	3.70509
GmNTP13	7.73154	13.7955	10.5256	10.5828	4.64555	4.58977	16.9457	13.9564	4.65681	4.86541	2.99814	3.63806
GmNTP14	4.96062	6.17068	8.23395	5.9162	2.69689	2.35728	3.0869	1.49037	6.00411	7.99005	3.6059	2.86634
GmNTP15	4.27989	5.82978	5.14614	4.67082	1.56737	2.61609	5.46716	2.60545	1.63134	1.85583	0.96989	0.756092
GmNTP16	0.023525	0	0.33767	0.615814	0.583666	0.158433	0	0	0	0	0	0
