# Supplementary material for: Identification and Expression Analysis of the Nucleotidyl Transferase Protein (NTP) Family in Soybean (Glycine max) under Various Abiotic Stresses
Source: Int J Mol Sci. 2024 Jan 17;25(2):1115. doi: 10.3390/ijms25021115 (PMC10816777; doi:10.3390/ijms25021115)
Supplement: Supplementary file 1 [file ijms-25-01115-s001.zip › Table S11.xlsx]

## Sheet: Sheet 1
Table S11. Reads abundance and difference multiple of GmNTP genes in the Gm_0h, salt-6 and drought-6 libraries.
Gene name	Gm_0h_1_count	Gm_0h_2_count	GmD6h_1_count	GmD6h_2_count	GmS6h_1_count	GmS6h_2_count	Gm_0h_1_FPKM	Gm_0h_2_FPKM	GmD6h_1_FPKM	GmD6h_2_FPKM	GmS6h_1_FPKM	GmS6h_2_FPKM	log2 (Salt-6/ Salt-0)	log2 (Drought-6/ Drought-0)
GmNTP1	1731	1483	2466	3134	2115	1948	9.46624	8.08042	15.05	15.9477	11.2661	11.8667	0.0371286	0.87925
GmNTP2	1025	805	2686	2523	3424	3074	9.48834	7.42259	27.7526	21.7204	30.8782	31.6909	1.531425381**	1.602535086**
GmNTP3	1924	2084	2127	2705	2659	2284	6.61575	7.14487	8.16497	8.65135	8.90766	8.74838	-0.00461645	0.344971
GmNTP4	387	317	158	74	518	485	3.51986	2.87884	1.60718	0.625966	4.59954	4.91551	0.212387	-1.601850166*
GmNTP5	3	0	23	18	5	11	0.0174173	0	0.220061	0.140005	0.0338777	0.0972566	1.83701	3.50578
GmNTP6	536	546	648	512	944	623	4.87668	4.95771	6.58826	4.33388	8.37796	6.32046	0.199003	0.17486
GmNTP7	673	650	62	34	695	322	6.62376	6.37853	0.676082	0.310442	6.66018	3.52613	-0.785964	-3.736046725**
GmNTP8	1194	1510	1873	2131	2068	2313	5.27211	6.64114	9.22944	8.7513	8.89453	11.375	0.399474	0.657506
GmNTP9	854	796	1640	1475	1900	1970	7.37508	6.85195	15.8069	11.8531	15.9805	18.9542	0.925618	0.99941
GmNTP10	387	396	855	1657	1073	1110	4.62356	4.72064	11.4371	18.4711	12.5329	14.8147	1.173041692**	1.686512485**
GmNTP11	833	845	2118	2868	1284	1410	4.84798	4.90734	13.7742	15.5434	7.28716	9.13955	0.376993	1.638167372**
GmNTP12	1083	1090	2075	2479	2341	2497	4.76031	4.77679	10.1828	10.1423	10.0276	12.2291	0.849307	1.145675499**
GmNTP13	560	445	432	606	697	854	4.00278	3.17187	3.44108	4.02557	4.85256	6.79502	0.323442	0.119949
GmNTP14	28	109	81	46	152	59	0.304819	1.1844	0.985574	0.469904	1.60652	0.699654	0.46224	0.220831
GmNTP15	110	151	127	65	169	110	0.97798	1.3483	1.25601	0.538696	1.47556	1.08951	-0.221125	-0.415172
GmNTP16	0	0	0	0	0	0	0	0	0	0	0	0	0	0
